# Supplementary material for: Combination of preparative and two-dimensional chromatographic fractionation with thermal analysis for the branching analysis of polyethylene
Source: Royal Society of Chemistry journal article supplement (doi:10.1039/c8py00522b), 2018-01-01
Supplement: c8py00522b1.pdf [file c8py00522b1.pdf]

## Combination of Preparative and Two-Dimensional Chromatographic Fractionation with Thermal Analysis for the Branching Analysis of Polyethylene

Paul S. Eselem Bungu,<sup>a</sup> Kristina Pflug<sup>b</sup> and Harald Pasch<sup>\*a</sup>

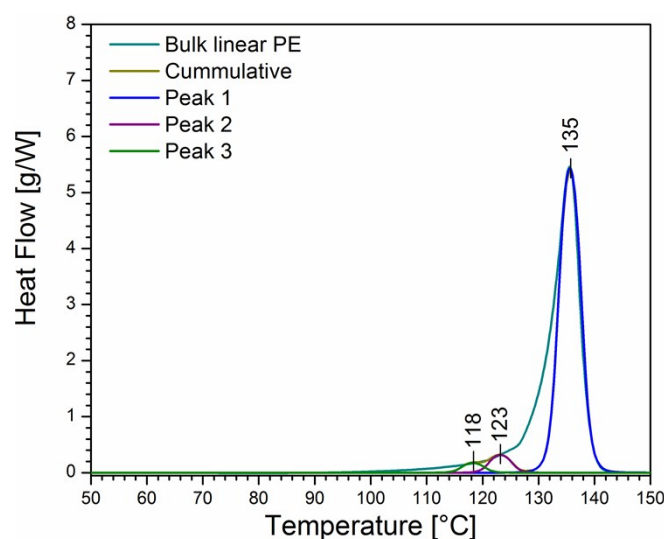

Figure S1: Peak Deconvolution of the SSA plot of linear PE 1, showing additional peaks at 118 and 123 °C

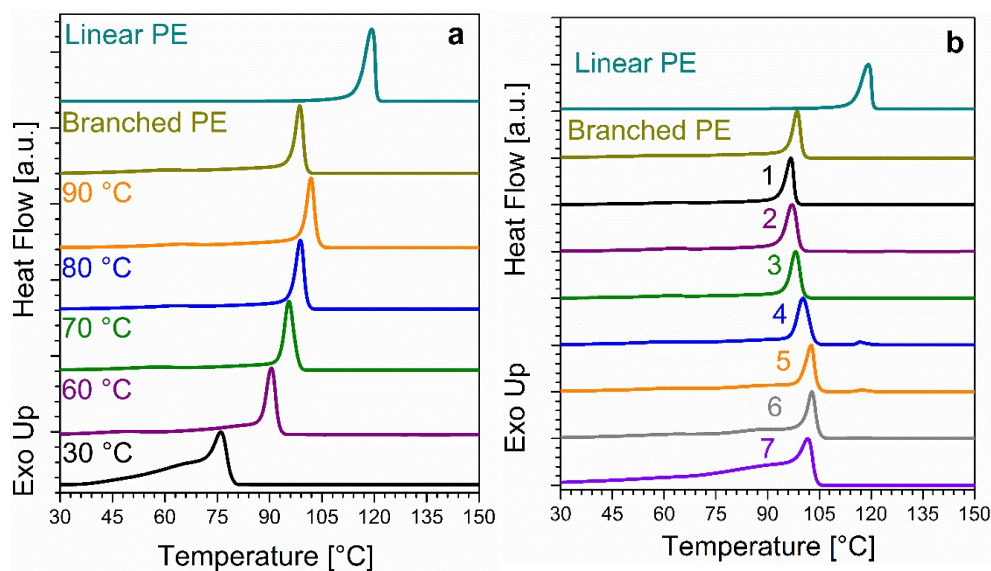

Figure S2: DSC crystallization exotherms of (a) TREF fractions and (b) MMF fractions. Linear PE 1 was used as the linear reference.

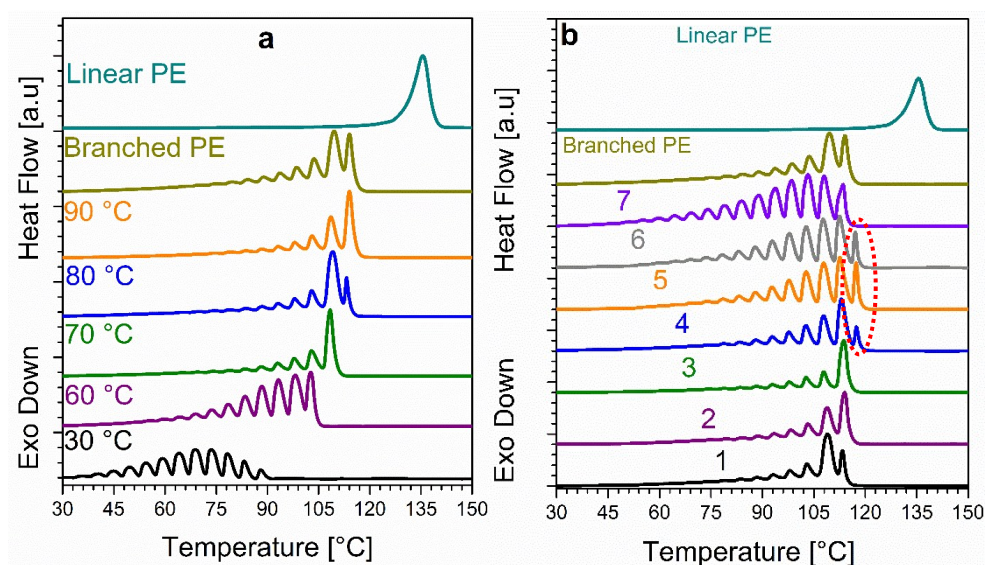

Figure S3: DSC melting endotherms obtained after thermal fractionation by SSA, (a) TREF fractions and (b) MMF fractions. Linear PE 1 was used as the linear reference.

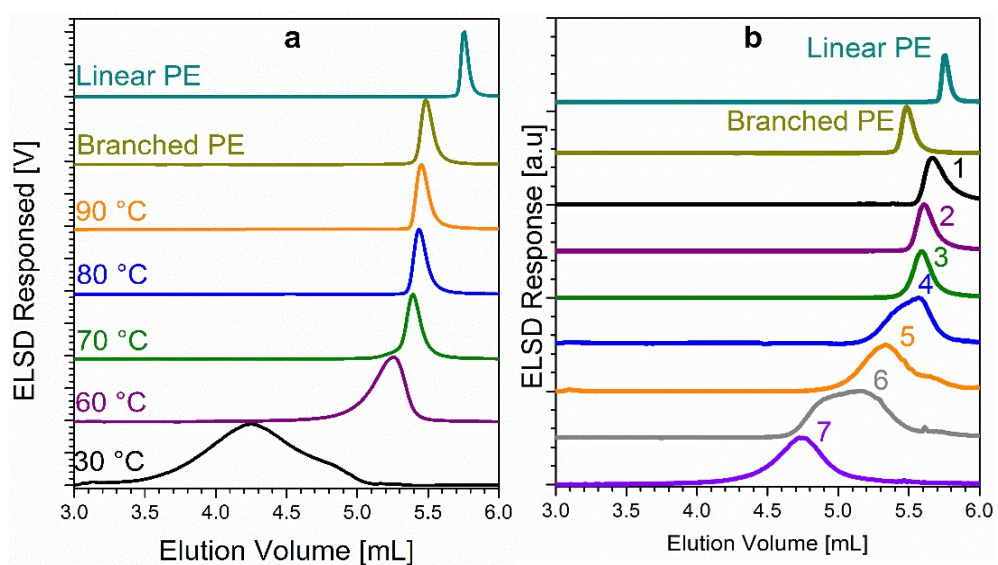

Figure S4: Individual HPLC elugrams of (a) TREF fractions and (b) MMF fractions of branched PE as compared to the linear and branched bulk samples. Linear PE 1 was used as the linear reference.
